# Supplementary material for: The ΔF508 Mutation in the Cystic Fibrosis Transmembrane Conductance Regulator Is Associated With Progressive Insulin Resistance and Decreased Functional β-Cell Mass in Mice
Source: Oxford University Press journal article supplement (doi:10.2337/db14-0810), 2015-08-17

SUPPLEMENTARY DATA

**Supplementary Figure 1. Body weight, fat mass, blood glucose and glucose tolerance in WT mice fed a high-protein diet.** **A, B:** Body weight was measured from 4 weeks to 14 weeks-of-age in male (A) and female (B) WT mice fed with a normal (ND) or a high-protein (HP) diet. Data are expressed as mean  $\pm$  SEM of 7 to 11 mice per group. **C-F:** Fat mass content relative to body weight and blood fed or fasted glucose levels were assessed in male (C and E, respectively) and female (D and F, respectively) WT mice. Data are mean  $\pm$  SEM of 7 to 20 mice per group. **G, H:** OGTTs were performed in male (G) and female (H) WT mice. Data are mean  $\pm$  SEM of 7 to 11 mice per group. \* $P < 0.05$  vs. ND.

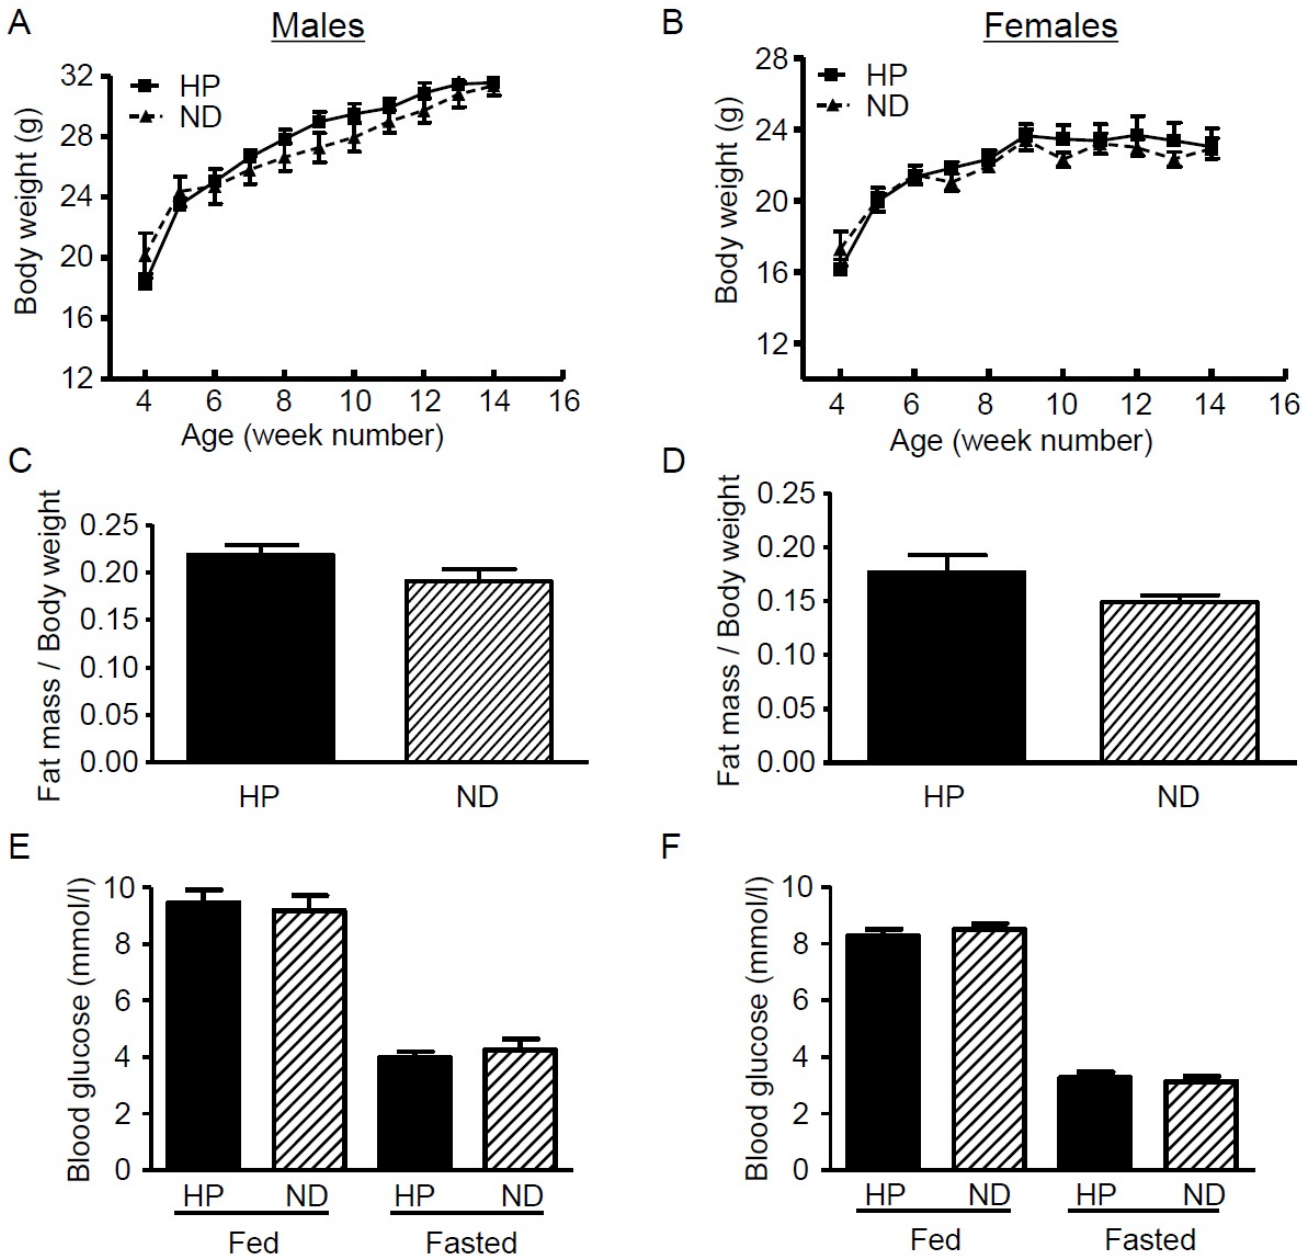

SUPPLEMENTARY DATA

G

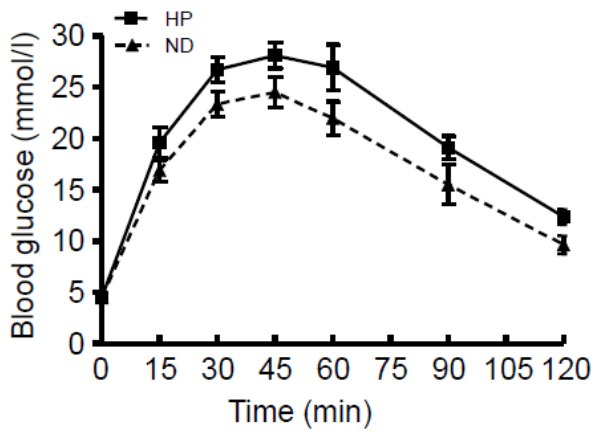

H

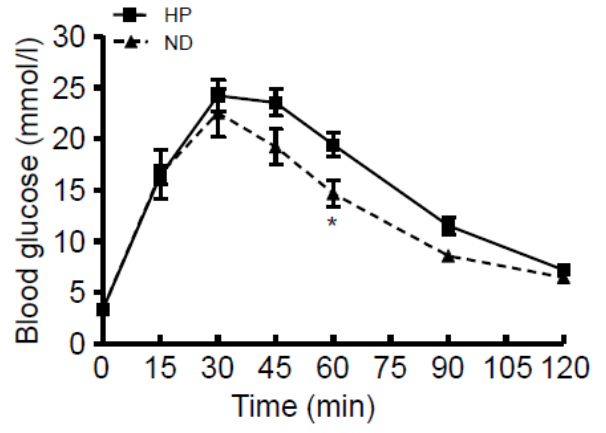

SUPPLEMENTARY DATA

**Supplementary Figure 2. Energy homeostasis in male  $\Delta F508$  mutant mice.** A: Respiratory Exchange Ratio (RER); B: heat production; C: food consumption; D: water consumption; E: locomotor activity were measured in 12-week old male WT and  $\Delta F508$  mice during light (6 AM to 6 PM) and dark (6 PM to 6 AM) cycles. Data are expressed as mean  $\pm$  SEM of 4-5 mice per group. \* $P < 0.05$  vs. WT.

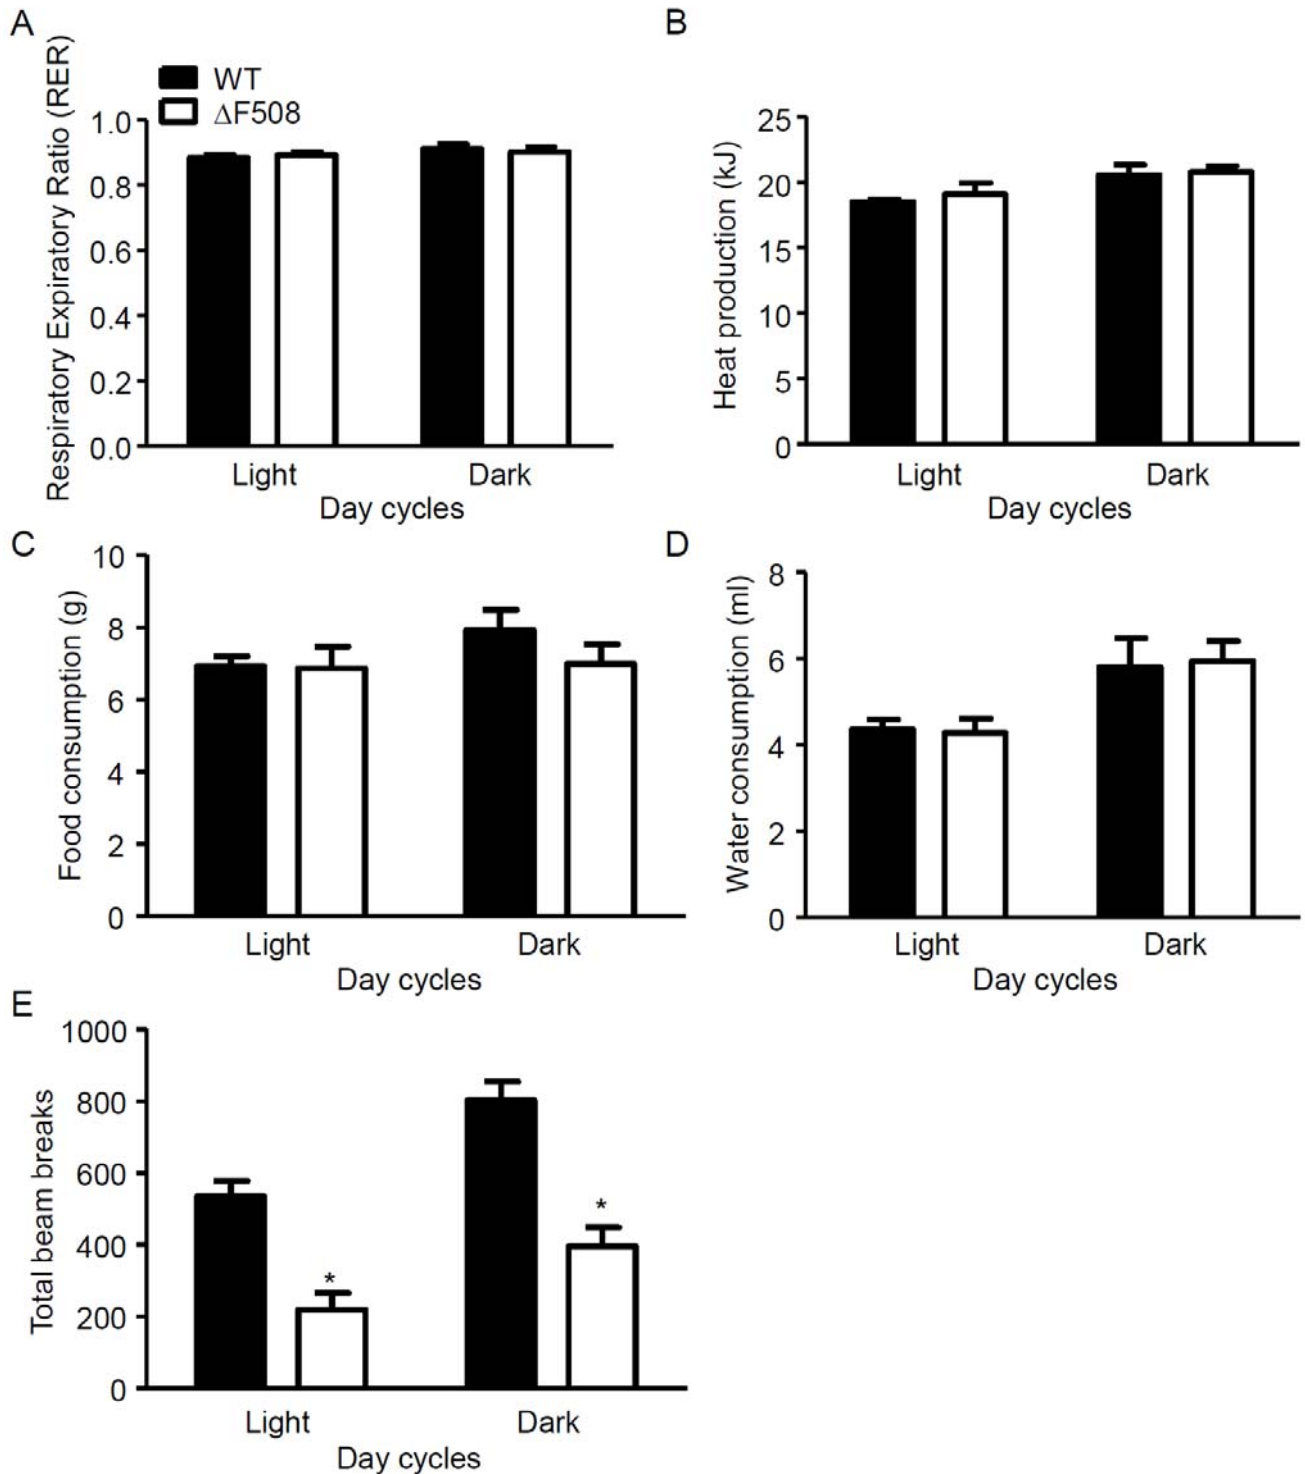

Supplement: db140810supplementarydata.pdf [file db140810supplementarydata.pdf]
